# Supplementary material
Source: publisher figshare collection journal article supplement (https://acs.figshare.com/ndownloader/files/11021648)
Supplement: Supplementary file 1 [file 11021648]

**Supporting Information for:**

**Mutations alter RNA-mediated conversion of human prions**

By: Erik J. Alred<sup>1</sup>, Izra Lodangco<sup>1</sup>, Jennifer Gallaher<sup>1</sup>, Ulrich H.E. Hansmann\*<sup>1</sup>

<sup>1</sup> University of Oklahoma, Department of Chemistry, 101 Stephenson Parkway, Norman, OK  
73019-5251, USA

## **Contents**

### **Results**

Figure S1. Difference in hydrogen bonding between bound and unbound 129M-178N mutant.

Figure S2. Difference in hydrogen bonding between bound and unbound 129V-178N mutant.

Figure S3. Difference in hydrogen bonding between bound and unbound 129V-178D wild type.

Table S1. Helical contacts in helix A for all four systems

Table S2. Helical contacts in helix C for all four systems

### **Attached Files**

Atomic coordinates of start configurations for the 129M-178D wild type, 129V-178D wild type, 129M-178N mutant and 129V-178N mutant are available in PDB-format as separate files 129M178D.pdb, 129V178D.pdb, 129M178N.pdb and 129V178N.pdb.

## Methods

Atomic coordinates of the start configurations of the four systems (129M-178D wild type, 129V-178D wild type, 129M-178N mutant and 179V-178N mutant) are available in PDB-format as separate files 129M178D.pdb, 129V178D.pdb, 129M178D.pdb and 129V178N.pdb.

## Results

### Figures S1 – S3. Contact map of prion sequences

In order to emphasize the shift in hydrogen bonding and the corresponding structural rearrangements we show in **Figure S1** in the lower triangle the hydrogen bonding contact map for the 129M-178N mutant, in **Figure S2** the hydrogen bonding contact map for the 129V-178N mutants, and in **Figure S3** the hydrogen bonding contact map for the 129V-178D wild type variant. For comparison, we show in all three supplemental figures the corresponding contact map of the 129M-178D wild type (the topic of our previous study) in the upper triangle. For the three figures, we have measured the frequency of backbone-backbone hydrogen bonds in both docked and undocked structures, and color-coded the corresponding differences. If a given hydrogen bond is more commonly seen in the bound structure than in the unbound, the coloring is reddish, and greenish in the opposite case. Data are taken only from trajectories that started with configuration where the RNA fragment binds to the prion at either site 1 or site 3. With this coloring scheme we find, for instance, for the wild type 129M-178D for residues 140-161, which

are part of helix A, a loss of helical contacts marked by greenish coloring of point parallel to the diagonal, and a corresponding increase in contacts that suggest  $\beta$  arrangements marked by reddish points orthogonal to the diagonal. Similar unfolding of helix A, and additional unfolding is observed in the upper triangle of **S1** for the 129M-D178N mutant, and to a lesser degree in **S2** for the 129V-178N mutant. Note the weak signal for the 129V-178D wild type variant.

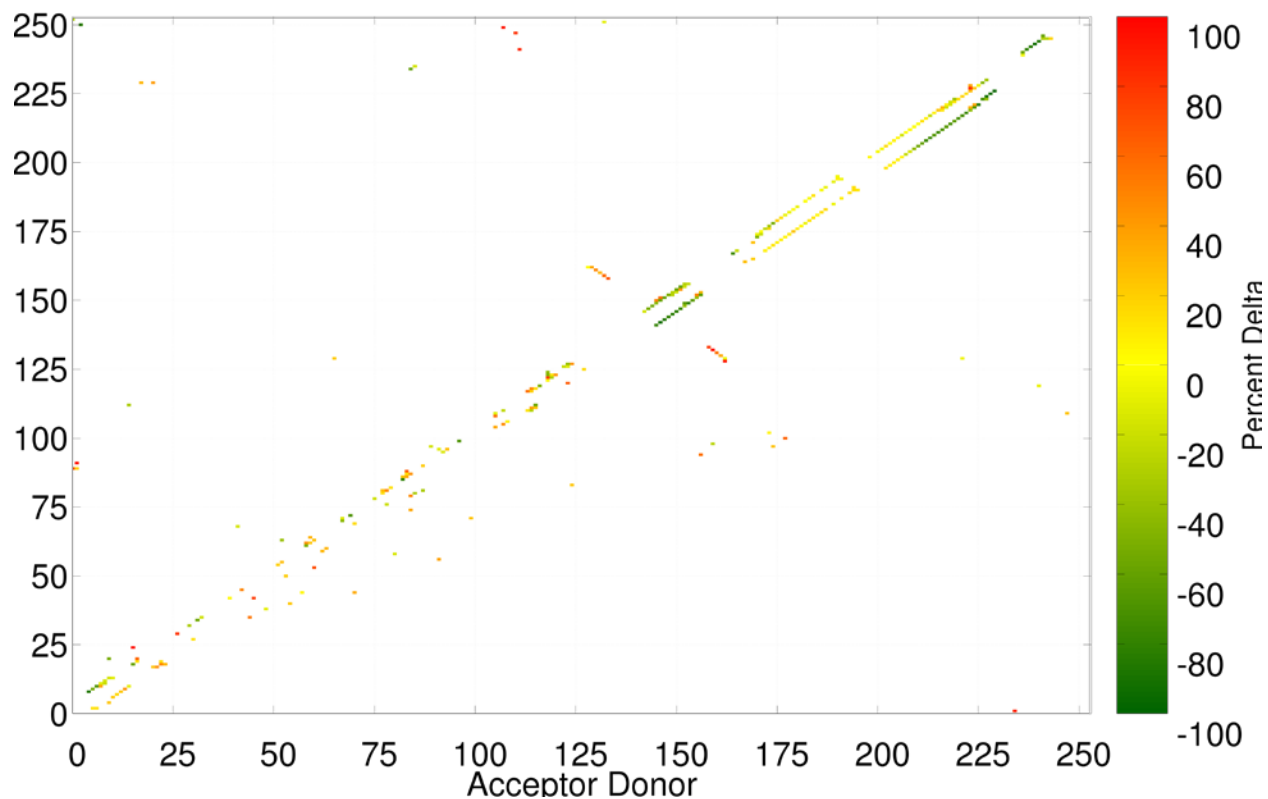

**Figure S1:** Difference in hydrogen bonding between bound and unbound prions for the 129M-178N mutant (below diagonal axis). For comparison, we show the corresponding frequency difference for the 129M-178D wild type (studied by us in previous work) in the upper triangle.

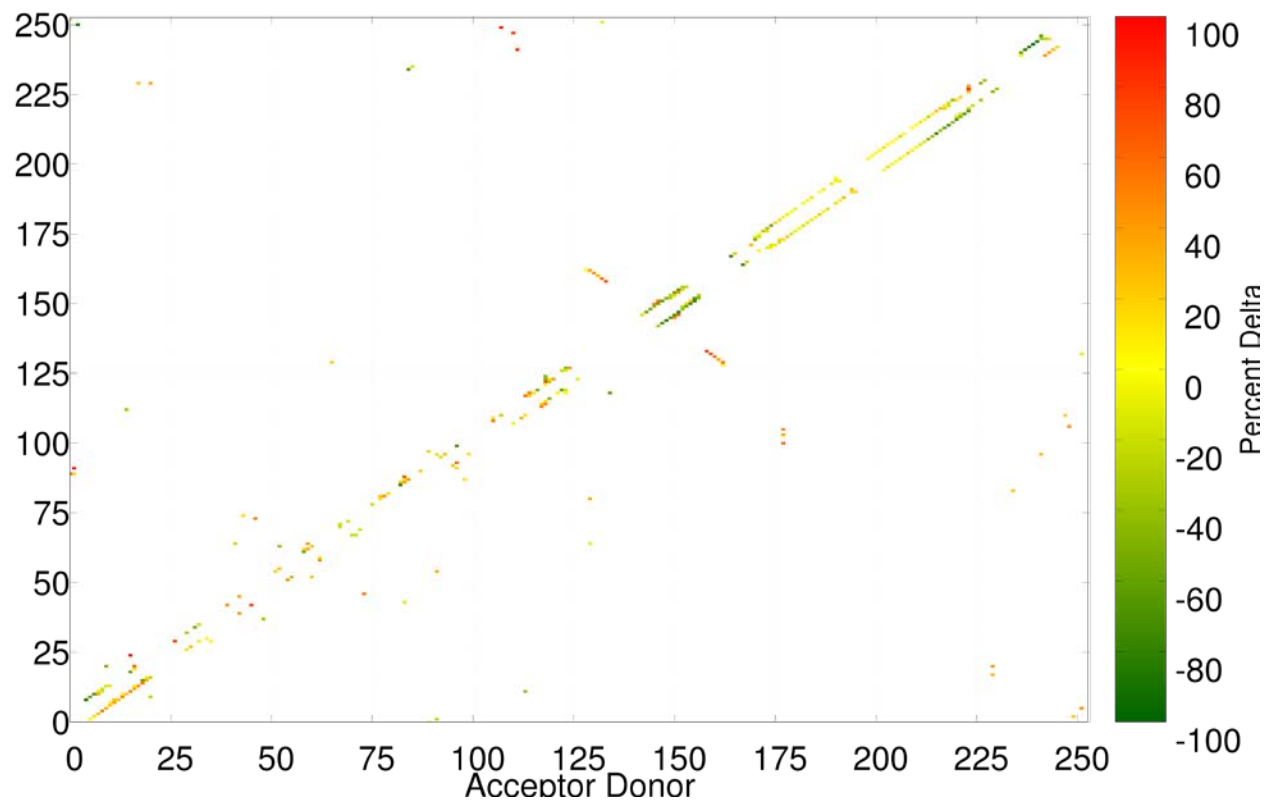

**Figure S2:** Difference in hydrogen bonding between bound and unbound prions for the 129V-178N mutant (below diagonal axis). For comparison, we show the corresponding frequency difference for the 129M-178D wild type (studied by us in previous work) in the upper triangle.

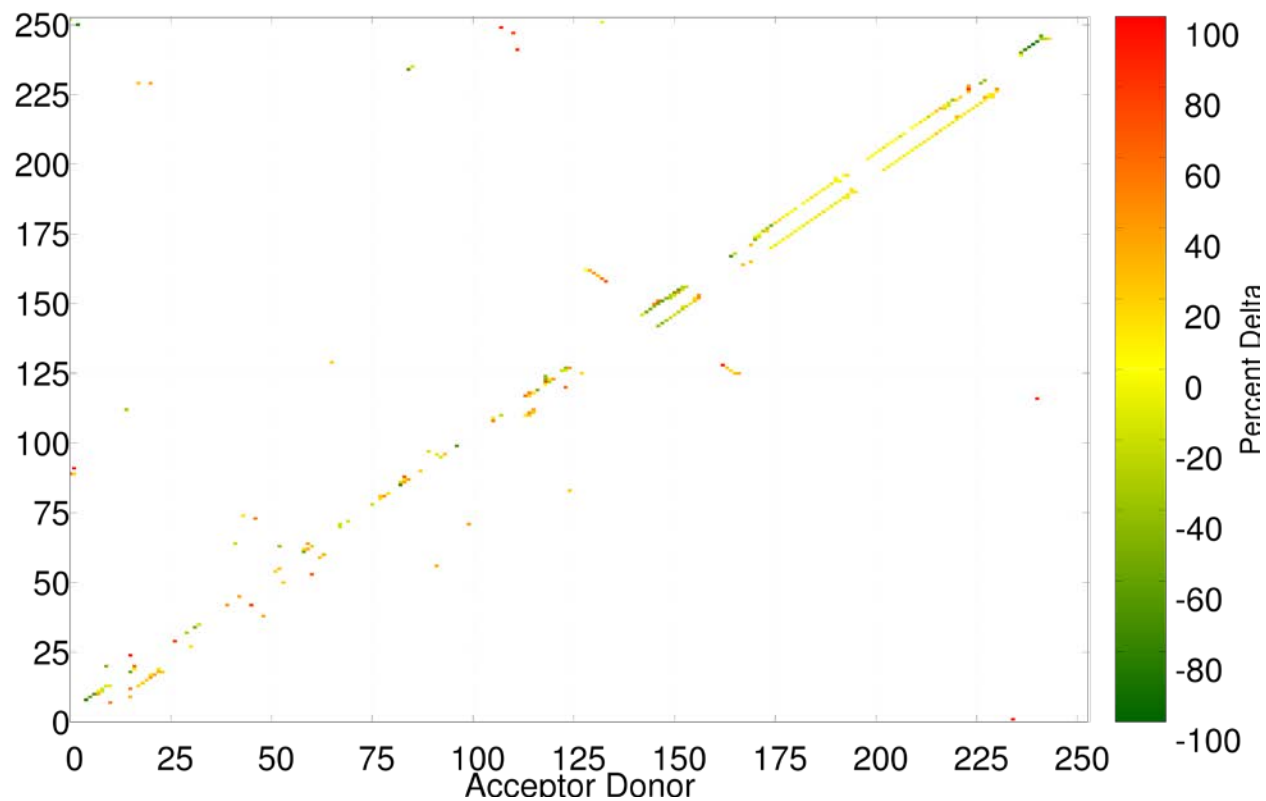

**Figure S3:** Difference in hydrogen bonding between bound and unbound prions for the 129V-178D wild type variant (below diagonal axis). For comparison, we show the corresponding frequency difference for the 129M-178D wild type (studied by us in previous work) in the upper triangle.

### **Tables S1 and S2: Helicity of helix A and helix C.**

We list in **Table S1** the average probability of finding a 1-4 backbone hydrogen bonds in helix A for a given time period for all four systems. For comparison, we also show the corresponding frequencies for the undocked protein. Comparing the first 100ns with the last 100ns allows us to quantify the loss of helical hydrogen-bonding with time. **Table S2** shows the same quantities for helix C.



|                           | 129M-178D          |                    |                      | 129V-178D          |                    |                      |
|---------------------------|--------------------|--------------------|----------------------|--------------------|--------------------|----------------------|
| Backbone<br>Hydrogen Bond | Control<br>0-300ns | Complex<br>0-100ns | Complex<br>200-300ns | Control<br>0-300ns | Complex<br>0-100ns | Complex<br>200-300ns |
| V161-P157                 | 50% (4%)           | 45% (5%)           | 10% (3%)             | 52% (3%)           | 51% (3%)           | 51% (4%)             |
| V160-R156                 | 75% (1%)           | 55% (3%)           | 16% (3%)             | 83% (3%)           | 78% (4%)           | 76% (5%)             |
| Q159-H155                 | 89% (4%)           | 62% (4%)           | 20% (4%)             | 90% (3%)           | 88% (4%)           | 80% (3%)             |
| N158-M154                 | 82% (4%)           | 65% (4%)           | 20% (4%)             | 81% (3%)           | 77% (4%)           | 79% (4%)             |
| P157-N153                 | 46% (4%)           | 43% (4%)           | 20% (4%)             | 47% (5%)           | 48% (3%)           | 53% (4%)             |
| R156-E152                 | 79% (2%)           | 66% (8%)           | 21% (4%)             | 82% (4%)           | 77% (5%)           | 79% (6%)             |
| H155-R151                 | 98% (4%)           | 81% (8%)           | 51% (3%)             | 96% (4%)           | 94% (7%)           | 86% (6%)             |
| M154-Y150                 | 74% (3%)           | 66% (7%)           | 31% (4%)             | 77% (4%)           | 79% (6%)           | 71% (5%)             |
| N153-Y149                 | 86% (4%)           | 50% (4%)           | 0% (0%)              | 89% (4%)           | 86% (5%)           | 92% (4%)             |
| E152-R148                 | 97% (2%)           | 72% (9%)           | 22% (4%)             | 96% (4%)           | 92% (6%)           | 89% (5%)             |
| R151-D147                 | 95% (3%)           | 41% (5%)           | 21% (4%)             | 93% (5%)           | 94% (5%)           | 84% (5%)             |
| Y150-E146                 | 99% (1%)           | 60% (5%)           | 10% (2%)             | 95% (4%)           | 95% (6%)           | 85% (6%)             |
| Y149-W145                 | 92% (5%)           | 41% (4%)           | 15% (5%)             | 92% (4%)           | 85% (4%)           | 82% (4%)             |
| R148-D144                 | 76% (5%)           | 43% (6%)           | 23% (5%)             | 77% (3%)           | 66% (6%)           | 65% (4%)             |
| D147-R143                 | 97% (2%)           | 62% (5%)           | 26% (3%)             | 96% (4%)           | 95% (3%)           | 91% (4%)             |
|                           | 129M-178N          |                    |                      | 129V-178N          |                    |                      |
| V161-P157                 | 52% (4%)           | 49% (2%)           | 16% (7%)             | 53% (4%)           | 53% (4%)           | 14% (3%)             |
| V160-R156                 | 80% (3%)           | 55% (4%)           | 15% (6%)             | 74% (4%)           | 62% (4%)           | 12% (6%)             |
| Q159-H155                 | 90% (4%)           | 67% (7%)           | 24% (8%)             | 88% (4%)           | 68% (5%)           | 22% (7%)             |
| N158-M154                 | 87% (6%)           | 69% (5%)           | 15% (8%)             | 81% (3%)           | 68% (4%)           | 18% (4%)             |
| P157-N153                 | 49% (7%)           | 49% (6%)           | 21% (5%)             | 47% (4%)           | 23% (4%)           | 16% (6%)             |
| R156-E152                 | 84% (5%)           | 67% (4%)           | 14% (7%)             | 78% (4%)           | 59% (8%)           | 19% (5%)             |
| H155-R151                 | 95% (3%)           | 40% (10%)          | 33% (6%)             | 97% (3%)           | 74% (9%)           | 29% (6%)             |
| M154-Y150                 | 70% (4%)           | 56% (9%)           | 20% (5%)             | 70% (8%)           | 53% (7%)           | 18% (4%)             |
| N153-Y149                 | 91% (3%)           | 49% (6%)           | 11% (7%)             | 85% (5%)           | 51% (9%)           | 11% (6%)             |
| E152-R148                 | 97% (3%)           | 48% (4%)           | 12% (5%)             | 95% (4%)           | 65% (8%)           | 16% (4%)             |
| R151-D147                 | 97% (2%)           | 36% (8%)           | 11% (8%)             | 96% (5%)           | 61% (7%)           | 14% (6%)             |
| Y150-E146                 | 92% (4%)           | 32% (5%)           | 14% (6%)             | 94% (3%)           | 65% (7%)           | 14% (7%)             |
| Y149-W145                 | 90% (5%)           | 47% (6%)           | 22% (6%)             | 95% (5%)           | 69% (6%)           | 16% (6%)             |
| R148-D144                 | 75% (4%)           | 39% (6%)           | 13% (7%)             | 80% (4%)           | 62% (7%)           | 10% (5%)             |
| D147-R143                 | 98% (2%)           | 42% (7%)           | 14% (6%)             | 94% (6%)           | 64% (8%)           | 12% (7%)             |

**Table S1:** Helical contacts in helix A. Data are for complexes where the RNA-fragment binds to either site 1 or site 3.

|                                   | 129M-178D                   |                            |                              | 129V-178D                  |                            |                              |
|-----------------------------------|-----------------------------|----------------------------|------------------------------|----------------------------|----------------------------|------------------------------|
| <b>Backbone<br/>Hydrogen Bond</b> | <b>Control<br/>0 -300ns</b> | <b>Complex<br/>0-100ns</b> | <b>Complex<br/>200-300ns</b> | <b>Control<br/>0-300ns</b> | <b>Complex<br/>0-100ns</b> | <b>Complex<br/>200-300ns</b> |
| Q227-Q223                         | 36% (5%)                    | 27% (6%)                   | 25% (7%)                     | 35% (5%)                   | 27% (6%)                   | 35% (5%)                     |
| Y226-S222                         | 41% (5%)                    | 40% (4%)                   | 32% (4%)                     | 39% (5%)                   | 40% (5%)                   | 30% (5%)                     |
| Y225-E221                         | 59% (5%)                    | 54% (3%)                   | 69% (4%)                     | 62% (7%)                   | 58% (7%)                   | 55% (6%)                     |
| A224-R220                         | 66% (6%)                    | 58% (6%)                   | 71% (6%)                     | 67% (6%)                   | 69% (5%)                   | 76% (7%)                     |
| Q223-E219                         | 78% (5%)                    | 79% (4%)                   | 73% (5%)                     | 74% (5%)                   | 69% (6%)                   | 65% (6%)                     |
| S222-Y218                         | 91% (3%)                    | 89% (4%)                   | 96% (4%)                     | 89% (4%)                   | 88% (6%)                   | 90% (6%)                     |
| E221-Q217                         | 94% (4%)                    | 94% (4%)                   | 93% (4%)                     | 92% (3%)                   | 81% (7%)                   | 97% (3%)                     |
| R220-T216                         | 95% (3%)                    | 85% (5%)                   | 87% (5%)                     | 97% (3%)                   | 90% (5%)                   | 86% (5%)                     |
| E219-I215                         | 94% (5%)                    | 85% (5%)                   | 87% (6%)                     | 92% (3%)                   | 92% (4%)                   | 90% (3%)                     |
| Y218-C214                         | 89% (4%)                    | 78% (7%)                   | 98% (5%)                     | 90% (4%)                   | 87% (4%)                   | 94% (5%)                     |
| Q217-M213                         | 88% (4%)                    | 85% (4%)                   | 87% (5%)                     | 92% (3%)                   | 88% (5%)                   | 91% (4%)                     |
| T216-Q212                         | 88% (3%)                    | 81% (5%)                   | 93% (6%)                     | 95% (3%)                   | 87% (5%)                   | 91% (4%)                     |
| I215-E211                         | 87% (5%)                    | 90% (4%)                   | 94% (5%)                     | 91% (3%)                   | 94% (4%)                   | 98% (5%)                     |
| C214-V210                         | 79% (5%)                    | 72% (4%)                   | 81% (5%)                     | 79% (5%)                   | 66% (7%)                   | 75% (7%)                     |
| M213V209                          | 95% (4%)                    | 89% (4%)                   | 91% (5%)                     | 90% (4%)                   | 91% (4%)                   | 97% (3%)                     |
| Q212-R208                         | 92% (3%)                    | 90% (5%)                   | 98% (3%)                     | 93% (2%)                   | 84% (7%)                   | 96% (5%)                     |
| E211-E207                         | 73% (6%)                    | 66% (6%)                   | 74% (5%)                     | 78% (6%)                   | 82% (7%)                   | 82% (6%)                     |
| V210-M206                         | 88% (5%)                    | 80% (6%)                   | 85% (4%)                     | 94% (4%)                   | 83% (7%)                   | 86% (5%)                     |
| V209-M205                         | 79% (5%)                    | 81% (5%)                   | 84% (5%)                     | 82% (3%)                   | 85% (6%)                   | 78% (7%)                     |
| R208-K204                         | 92% (3%)                    | 85% (6%)                   | 86% (4%)                     | 95% (3%)                   | 86% (5%)                   | 81% (5%)                     |
| E207-V203                         | 93% (5%)                    | 86% (4%)                   | 96% (4%)                     | 98% (3%)                   | 94% (3%)                   | 83% (5%)                     |
| M206-D202                         | 97% (4%)                    | 88% (5%)                   | 87% (4%)                     | 92% (3%)                   | 90% (5%)                   | 91% (4%)                     |
| M205-T201                         | 70% (5%)                    | 73% (5%)                   | 76% (5%)                     | 78% (5%)                   | 76% (3%)                   | 71% (7%)                     |
| K204-E200                         | 91% (5%)                    | 87% (6%)                   | 83% (3%)                     | 88% (5%)                   | 82% (6%)                   | 93% (3%)                     |
|                                   | 129M-178N                   |                            |                              | 129V-178N                  |                            |                              |
| Q227-Q223                         | 29% (7%)                    | 13% (9%)                   | 10% (8%)                     | 30% (5%)                   | 22% (4%)                   | 17% (6%)                     |
| Y226-S222                         | 43% (6%)                    | 29% (6%)                   | 13% (7%)                     | 31% (5%)                   | 25% (5%)                   | 11% (7%)                     |
| Y225-E221                         | 72% (7%)                    | 49% (8%)                   | 12% (6%)                     | 62% (7%)                   | 58% (3%)                   | 10% (8%)                     |
| A224-R220                         | 63% (9%)                    | 43% (7%)                   | 15% (8%)                     | 69% (6%)                   | 69% (5%)                   | 21% (9%)                     |
| Q223-E219                         | 72% (6%)                    | 46% (8%)                   | 21% (7%)                     | 79% (5%)                   | 67% (5%)                   | 17%(10%)                     |
| S222-Y218                         | 88% (4%)                    | 60% (5%)                   | 24% (6%)                     | 89% (4%)                   | 75% (6%)                   | 21% (8%)                     |

|           |          |          |          |          |          |          |
|-----------|----------|----------|----------|----------|----------|----------|
| E221-Q217 | 94% (7%) | 51% (8%) | 24% (7%) | 84% (6%) | 70% (6%) | 14% (8%) |
| R220-T216 | 97% (4%) | 67% (9%) | 27% (9%) | 94% (5%) | 85% (5%) | 33% (7%) |
| E219-I215 | 82% (5%) | 64% (8%) | 24% (6%) | 92% (3%) | 87% (4%) | 15% (6%) |
| Y218-C214 | 92% (5%) | 58% (7%) | 26% (5%) | 91% (4%) | 76% (5%) | 26% (8%) |
| Q217-M213 | 91% (4%) | 62% (7%) | 30% (4%) | 87% (4%) | 83% (4%) | 40% (6%) |
| T216-Q212 | 93% (3%) | 67% (6%) | 41% (7%) | 86% (4%) | 72% (4%) | 42% (7%) |
| I215-E211 | 84% (4%) | 53% (8%) | 38% (6%) | 87% (4%) | 76% (5%) | 42% (5%) |
| C214-V210 | 81% (8%) | 67% (5%) | 37% (7%) | 72% (6%) | 59% (4%) | 39% (6%) |
| M213V209  | 82% (4%) | 61% (8%) | 31% (5%) | 98% (3%) | 89% (5%) | 26% (7%) |
| Q212-R208 | 93% (7%) | 68% (6%) | 27% (4%) | 93% (5%) | 97% (5%) | 16% (8%) |
| E211-E207 | 87% (6%) | 77% (6%) | 31% (6%) | 81% (5%) | 77% (6%) | 20% (7%) |
| V210-M206 | 95% (3%) | 88% (8%) | 55% (7%) | 92% (4%) | 82% (5%) | 52% (7%) |
| V209-M205 | 83% (6%) | 77% (5%) | 44% (4%) | 77% (5%) | 72% (4%) | 31% (8%) |
| R208-K204 | 92% (4%) | 82% (9%) | 53% (6%) | 98% (5%) | 95% (4%) | 44% (7%) |
| E207-V203 | 94% (5%) | 89% (6%) | 87% (5%) | 93% (5%) | 95% (5%) | 93% (6%) |
| M206-D202 | 92% (4%) | 90% (5%) | 87% (4%) | 88% (4%) | 79% (4%) | 84% (7%) |
| M205-T201 | 73% (9%) | 70% (6%) | 72% (5%) | 72% (4%) | 60% (5%) | 69% (5%) |
| K204-E200 | 83% (7%) | 79% (4%) | 88% (3%) | 91% (4%) | 83% (4%) | 86% (8%) |

**Table S2:** Helical contacts for helix C. Data are for complexes where the RNA-fragment binds to either site 1 or site 3.
